# Supplementary material for: Insights into soil nematode diversity and bacterial community of Thai jasmine rice rhizosphere from different paddy fields in Thailand
Source: PeerJ. 2024 Apr 23;12:e17289. doi: 10.7717/peerj.17289 (PMC11048080; doi:10.7717/peerj.17289)
Supplement: Supplemental Information 12 — CCS, sampling from Chachoengsao province; NYK, sampling from Nakhon Nayok province; PTT, sampling from Pathum Thani province; AYY, sampling from Phra Nakhon Si Ayutthaya province; PAR, sampling from Prachin Buri province. [file peerj-12-17289-s012.xlsx]

## Sheet: Tags 
#Sample_name	Total_reads	Combined_reads	Uncombined_reads	Percent_combined(%)	Combined_base(bp)	Min_len(bp)	Max_len(bp)	Avg_len(bp)
AYY1	129896	128700	1196	99.08	32568951	105	390	253
AYY2	135275	134115	1160	99.14	33942324	130	381	253
AYY3	138212	137276	936	99.32	34749294	127	389	253
CCS1	120922	120090	832	99.31	30393771	107	380	253
CCS2	137447	136448	999	99.27	34529408	127	378	253
CCS3	134466	133475	991	99.26	33779337	136	390	253
NYK1	123267	122257	1010	99.18	30943980	127	371	253
NYK2	128003	126988	1015	99.21	32137792	127	390	253
NYK3	120784	119819	965	99.2	30323565	77	379	253
PAR1	122083	121185	898	99.26	30671875	148	353	253
PAR2	134407	133363	1044	99.22	33754388	134	373	253
PAR3	137306	136177	1129	99.18	34459282	129	384	253
PTT1	124838	123943	895	99.28	31380988	129	384	253
PTT2	130408	129339	1069	99.18	32743924	58	390	253
PTT3	138486	137312	1174	99.15	34769799	127	390	253
#Total	1955800	1940487	15313	99.22	491148678	148	353	253

## Sheet: clean data
Sample Name	Raw PE(#)	Combined(#)	Qualified(#)	Nochime(#)	Base(nt)	AvgLen(nt)	Q20	Q30	GC%	Effective%
AYY1	129896	128700	128476	88569	22413902	253	99.51	98.51	55.53	68.18
AYY2	135275	134115	133817	100790	25509393	253	99.52	98.55	55.76	74.51
AYY3	138212	137276	136987	102253	25882996	253	99.52	98.54	56.05	73.98
CCS1	120922	120090	119876	78016	19746832	253	99.52	98.53	57.08	64.52
CCS2	137447	136448	136124	91422	23136722	253	99.52	98.52	56.84	66.51
CCS3	134466	133475	133196	93011	23539372	253	99.51	98.49	56.98	69.17
NYK1	123267	122257	122014	78891	19970518	253	99.45	98.31	57.47	64
NYK2	128003	126988	126704	84428	21369407	253	99.51	98.5	57.24	65.96
NYK3	120784	119819	119586	77693	19663847	253	99.53	98.54	57.05	64.32
PAR1	122083	121185	120939	85438	21623641	253	99.51	98.52	56.48	69.98
PAR2	134407	133363	133100	95589	24192049	253	99.52	98.55	56.5	71.12
PAR3	137306	136177	135926	98598	24947241	253	99.53	98.55	56.22	71.81
PTT1	124838	123943	123739	89414	22638014	253	99.52	98.55	56.45	71.62
PTT2	130408	129339	129122	99873	25285340	253	99.53	98.53	55.84	76.59
PTT3	138486	137312	137087	114166	28910289	253	99.53	98.56	55.97	82.44
