# Supplementary material for: Insights into soil nematode diversity and bacterial community of Thai jasmine rice rhizosphere from different paddy fields in Thailand
Source: PeerJ. 2024 Apr 23;12:e17289. doi: 10.7717/peerj.17289 (PMC11048080; doi:10.7717/peerj.17289)
Supplement: Supplemental Information 14 — CCS, sampling from Chachoengsao province; NYK, sampling from Nakhon Nayok province; PTT, sampling from Pathum Thani province; AYY, sampling from Phra Nakhon Si Ayutthaya province; PAR, sampling from Prachin Buri province. [file peerj-12-17289-s014.xlsx]

## Sheet: final data of nema
	roots (6grams)
	CCS3	NYK8	PAR4	PTT4	AYY1
Meloidogyne spp.(J2)	9840	9840	348	926	5540	Meloidogyne graminicola
Hirschmanniella spp.	18	18	35	30	43
Pratylenchus spp.	0	0	28	0	0
Helicotylenchus spp.	0	0	0	20	0
Tylenchorhynchus spp.	30	30	0	0	0
Free living nematode	0	0	10	12	0
	Soil (1.5kg)
	CCS3	NYK8	PAR4	PTT4	AYY1
Meloidogyne spp.(J2)	118	54	108	425	102	Meloidogyne graminicola
Hirschmanniella spp.	22	13	28	66	27
Pratylenchus spp.	0	14	33	0	0
Helicotylenchus spp.	29	0	0	139	0
Tylenchorhynchus spp.	15	14	0	0	0
Free living nematode	170	79	121	154	353

## Sheet: CCS3
			roots
			rep1	rep2	rep3	sum	Av
		Meloidogyne spp.(J2)	3840	3360	2640	9840	3280
		Hirschmanniella spp.	4	11	3	18	6
		Pratylenchus spp.	0	0	0	0	0
		Helicotylenchus spp.	0	0	0	0	0
		Tylenchorhynchus spp.	12	1	17	30	10
		F1	0	0	0	0	0
		F2	0	0	0	0	0
		F3	0	0	0	0	0
		F4	0	0	0	0	0
		F5	0	0	0	0	0
		F6	0	0	0	0	0
		F7	0	0	0	0	0
		P1	0	0	0	0	0
		P2	0	0	0	0	0
		unknow1	0	0	0	0	0
			soil
			rep1	rep2	rep3	sum	Av
		Meloidogyne spp.(J2)	38	25	55	118	39.3333
		Hirschmanniella spp.	16	3	3	22	7.33333
		Pratylenchus spp.	0	0	0	0	0
		Helicotylenchus spp.	5	3	21	29	9.66667
		Tylenchorhynchus spp.	7	4	4	15	5
		F1	32	40	77	149	49.6667
		F2	8	0	4	12	4
		F3	0	0	0	0	0
		F4	3	6	0	9	3
		F5	0	0	0	0	0
		F6	0	0	0	0	0
		F7	0	0	0	0	0
		P1	0	0	0	0	0
		P2	0	0	0	0	0
		unknow1	0	0	0	0	0

## Sheet: NYK8
			roots
			rep1	rep2	rep3	sum	Av
		Meloidogyne spp.(J2)	48	33	35	234	38.6667
		Hirschmanniella spp.	18	12	9	61	13
		Pratylenchus spp.	9	7	3	19	6.33333
		Helicotylenchus spp.	0	0	0	29	0
		Tylenchorhynchus spp.	0	0	0	15	0
		F1	3	2	5	159	3.33333
		F2	0	0	0	12	0
		F3	0	0	0	0	0
		F4	0	0	0	9	0
		F5	0	0	0	0	0
		F6	0	0	0	0	0
		F7	0	0	0	0	0
		P1	0	0	0	0	0
		P2	0	0	0	0	0
		unknow1	0	0	0	0	0
			3	2	5
			soil
			rep1	rep2	rep3	sum	Av
		Meloidogyne spp.(J2)	18	23	13	54	18
		Hirschmanniella spp.	7	3	3	13	4.33333
		Pratylenchus spp.	4	5	5	14	4.66667
		Helicotylenchus spp.	0	0	0	0	0
		Tylenchorhynchus spp.	4	7	3	14	4.66667
		F1	12	17	6	35	11.6667
		F2	4	8	13	25	8.33333
		F3	11	4	4	19	6.33333
		F4	0	0	0	0	0
		F5	0	0	0	0	0
		F6	0	0	0	0	0
		F7	0	0	0	0	0
		P1	0	0	0	0	0
		P2	0	0	0	0	0
		unknow1	0	0	0	0	0
			27	29	23

## Sheet: PAR4
			roots
			rep1	rep2	rep3	sum	Av
		Meloidogyne spp.(J2)	144	99	105	348	116
		Hirschmanniella spp.	15	12	8	35	11.6667
		Pratylenchus spp.	12	9	7	28	9.33333
		Helicotylenchus spp.	0	0	0	0	0
		Tylenchorhynchus spp.	0	0	0	0	0
		F1	4	3	3	10	3.33333
		F2	0	0	0	0	0
		F3	0	0	0	0	0
		F4	0	0	0	0	0
		F5	0	0	0	0	0
		F6	0	0	0	0	0
		F7	0	0	0	0	0
		P1	0	0	0	0	0
		P2	0	0	0	0	0
		unknow1	19	12	9	40	13.3333
			23	15	12
			soil
			rep1	rep2	rep3	sum	Av
		Meloidogyne spp.(J2)	36	46	26	108	36
		Hirschmanniella spp.	14	6	8	28	9.33333
		Pratylenchus spp.	8	15	10	33	11
		Helicotylenchus spp.	0	0	0	0	0
		Tylenchorhynchus spp.	0	0	0	0	0
		F1	12	17	6	35	11.6667
		F2	4	8	13	25	8.33333
		F3	9	5	4	18	6
		F4	4	3	1	8	2.66667
		F5	0	0	0	0	0
		F6	2	5	5	12	4
		F7	13	7	3	23	7.66667
		P1	0	0	0	0	0
		P2	0	0	0	0	0
		unknow1	4	12	7	23	7.66667
			48	57	39

## Sheet: PTT4
			roots
			rep1	rep2	rep3	sum	Av
		Meloidogyne spp.(J2)	386	306	234	926	308.667
		Hirschmanniella spp.	12	1	17	30	10
		Pratylenchus spp.	0	0	0	0	0
		Helicotylenchus spp.	4	11	5	20	6.66667
		Tylenchorhynchus spp.	0	0	0	0	0
		F1	4	2	6	12	4
		F2	0	0	0	0	0
		F3	0	0	0	0	0
		F4	0	0	0	0	0
		F5	0	0	0	0	0
		F6	0	0	0	0	0
		F7	0	0	0	0	0
		P1	0	0	0	0	0
		P2	0	0	0	0	0
		unknow1	0	0	0	0	0
			soil
			rep1	rep2	rep3	sum	Av
		Meloidogyne spp.(J2)	145	102	178	425	141.667
		Hirschmanniella spp.	26	17	23	66	22
		Pratylenchus spp.	0	0	0	0	0
		Helicotylenchus spp.	52	59	28	139	46.3333
		Tylenchorhynchus spp.	0	0	0	0	0
		F1	31	56	27	114	38
		F2	0	0	0	0	0
		F3	0	0	0	0	0
		F4	4	8	8	20	6.66667
		F5	3	11	6	20	6.66667
		F6	0	0	0	0	0
		F7	0	0	0	0	0
		P1	0	0	0	0	0
		unknow1	0	0	0	0	0
			38	75	41

## Sheet: AYY1
			roots
			rep1	rep2	rep3	sum	Av
		Meloidogyne spp.(J2)	2230	1420	1890	5540	1846.67
		Hirschmanniella spp.	14	11	18	43	14.3333
		Pratylenchus spp.	0	0	0	0	0
		Helicotylenchus spp.	0	0	0	0	0
		Tylenchorhynchus spp.	0	0	0	0	0
		F1	0	0	0	0	0
		F2	0	0	0	0	0
		F3	0	0	0	0	0
		F4	0	0	0	0	0
		F5	0	0	0	0	0
		F6	0	0	0	0	0
		F7	0	0	0	0	0
		P1	0	0	0	0	0
		P2	0	0	0	0	0
		unknow1	0	0	0	0	0
			soil
			rep1	rep2	rep3	sum	Av
		Meloidogyne spp.(J2)	23	42	37	102	34
		Hirschmanniella spp.	8	13	6	27	9
		Pratylenchus spp.	0	0	0	0	0
		Helicotylenchus spp.	0	0	0	0	0
		Tylenchorhynchus spp.	0	0	0	0	0
		F1	101	57	75	233	77.6667
		F2	0	0	0	0	0
		F3	0	0	0	0	0
		F4	11	5	8	24	8
		F5	0	0	0	0	0
		F6	32	24	40	96	32
		F7	0	0	0	0	0
		P2	0	0	0	0	0
		unknow1	0	0	0	0	0
			144	86	123
