# Supplementary material for: Insights into soil nematode diversity and bacterial community of Thai jasmine rice rhizosphere from different paddy fields in Thailand
Source: PeerJ. 2024 Apr 23;12:e17289. doi: 10.7717/peerj.17289 (PMC11048080; doi:10.7717/peerj.17289)
Supplement: Supplemental Information 15 — CCS, sampling from Chachoengsao province; NYK, sampling from Nakhon Nayok province; PTT, sampling from Pathum Thani province; AYY, sampling from Phra Nakhon Si Ayutthaya province; PAR, sampling from Prachin Buri province. [file peerj-12-17289-s015.xlsx]

## Sheet: elements
				Soil elements (mg/kg)
Sample Name	pH (1:1)	ECe1 (ds/m)	OM2 (%)	Total N3 (%)	P4	K5	Ca5	Mg5	Fe6	Mn6	Cu6	Zn6
PAR4	4.77	0.42	1.218	0.07	29.59	15.37	404.79	28.8	384.92	15.8	0.92	0.7
			1.179	0.07	29.52	15.2	351.27	29.33	376.51	16.52	0.9	0.72
			1.169	0.07	29.81	15.14	387.14	30.01	376.58	15.94	0.98	0.74
NYK8	5.21	0.37	1.798	0.09	8.77	11.2	550.04	7	198.18	8.64	0.44	0.71
			1.806	0.09	8.73	12.52	483.72	7.1	246.93	8.04	0.45	0.7
			1.847	0.09	7.99	12.22	521.89	7.24	246.01	8.09	0.47	0.7
AYY1	7.18	0.79	4.381	0.21	26.11	185.75	5192.09	393.95	240.36	61.41	7.19	2.12
			4.422	0.21	26.04	185.11	5386.02	399.06	234.18	61.94	7.35	2.08
			4.451	0.23	26.54	185.67	5325.48	400.28	242.17	62.01	7.24	2.01
PTT4	6.53	0.84	2.489	0.11	48.8	225.5	3101.52	672.22	177.87	59.39	45.31	15.01
			2.46	0.11	48.63	230.57	3153.88	674.07	177.01	61.36	46.54	15.01
			2.393	0.12	48.01	228.09	3159.12	678.45	178.09	59.23	46.52	16.51
CCS-3	5.94	10.52	0.515	0.02	18.74	238.5	2996.8	695.26	117.04	2.32	1.7	0.79
			0.526	0.02	18.67	233.82	3117.07	642.01	116.43	2.21	1.68	0.82
			0.506	0.02	18.31	235.48	3018.27	652.97	116.82	2.35	1.7	0.84

## Sheet: soil physical
Sample Name	Sand	Silt	Clay	Texture1
Name	(%)	(%)	(%)
PAR4	35.61	52.9	11.48	Silt Loam
NYK8	47.17	40.49	12.34	Loam
AYY1	11.1	34.04	54.87	Clay
PTT4	6	34.18	59.82	Clay
CCS-3	59.2	32.19	8.61	Sandy Loam
